BioRxiv Preprint

# 1 Return of an apex predator to a suburban preserve 2 triggers a rapid trophic cascade 3

4 Kevin Leempoel<sup>1</sup>, Jordana Meyer<sup>1</sup>, Trevor Hebert<sup>2</sup>, Nicole Nova<sup>1</sup>, Elizabeth A. Hadly<sup>1,2,3</sup>

5 1. Department of Biology, Stanford University, Stanford, CA, USA

6 2. Jasper Ridge Biological Preserve, Stanford University, Stanford, CA, USA

7 3. Woods Institute for the Environment, Stanford University, Stanford, CA, USA

8 Corresponding Author: Kevin Leempoel [kevin.leempoel@stanford.edu](mailto:kevin.leempoel@stanford.edu)

## 9 ABSTRACT

10 Absence of apex predators simplifies food chains, leading to trophic degradation of ecosystems and  
11 diminution of the services they provide<sup>1</sup>. However, most predators do not coexist well with humans, which  
12 has resulted in a decline of carnivores and functional ecosystems worldwide<sup>2</sup>. In some instances, cryptic  
13 carnivores manage to survive amidst human settlements, finding refuge in small biological islands  
14 surrounded by urban landscapes. In such a system, we used two non-invasive data collection methods  
15 (camera trapping and fecal sampling) to investigate the multiannual relationship between predators and  
16 prey, and between competitors, through analysis of: (1) relative abundance and detection probability of  
17 species over time, (2) causal interactions via empirical dynamic modeling, (3) diet, and (4) diel activity  
18 patterns. All approaches show concordance in the results: the natural return of an apex predator, the  
19 puma (*Puma concolor*), triggered a trophic cascade, affecting the abundance and behavior of its main  
20 prey, subordinate predators and other prey in the studied system. Our study demonstrates that trophic  
21 recovery can occur rapidly following the return of a top predator, even in small protected areas in  
22 increasingly urbanized landscapes.

## 23 INTRODUCTION

24 Populations of apex predators are in global decline, resulting in a major trophic downgrading of functional  
25 ecosystems and ecosystem services<sup>1-3</sup>. Trophic cascades — the top-down effects predators have on food  
26 webs across multiple trophic levels — are especially relevant to management efforts to re-introduce  
27 predators and restore ecosystem function<sup>4,5</sup>. Beyond the common tri-trophic model (carnivore-herbivore-  
28 plants), apex predators also influence food webs through intermediary species (e.g., omnivores and  
29 mesopredators)<sup>6</sup>. Top predators control surges of mesopredator populations and thus decrease pressure  
30 on subordinate mesopredators and prey<sup>7,8</sup>, or they may directly predate or scare prey, changing their  
31 foraging behavior, location, and vigilance<sup>4,9</sup>. However, documenting a dynamic trophic cascade in real  
32 time is rare and most studies instead rely on short-term monitoring of indirect evidence, or comparisons  
33 of systems with or without an apex predator<sup>4</sup>.

34 In North America, trophic cascades caused by pumas have not attracted the same attention as those  
35 caused by wolves<sup>10</sup>, despite pumas being the most widely distributed carnivore in the western  
36 hemisphere<sup>2</sup>. To our knowledge, only three studies on puma-mediated trophic cascades have been  
37 published to date, all of which relate to their extirpation from studied ecosystems<sup>11-13</sup>. Pumas are known  
38 to be subordinate to grizzly bears (*Ursus arctos*), wolves (*Canis lupus*) and jaguars (*Panthera onca*) where  
39 these rarer predators still occur<sup>14</sup>. Pumas have become the apex predator across the Americas, despite  
40 some regional extirpation and their fragmented distribution<sup>15,16</sup>. Moreover, pumas are affected by human  
41 activities and tend to avoid humans both in space (e.g., a lower occupancy correlated with human  
42 density<sup>14</sup>) and time (e.g., increased nocturnal activity in high-versus-low human densities<sup>17</sup>).

43 Here, we demonstrate that the natural increase in resident pumas in a small exurban preserve ( $\approx 5 \text{ km}^2$ )  
44 was responsible for a multi-tiered trophic cascade, affecting both the abundance and behavior of its main  
45 prey, the mule deer (*Odocoileus hemionus*), and its competitor, the coyote (*Canis latrans*), which in turn  
46 had downstream effects on subordinate predators and prey. We employed a suite of different approaches  
47 to reveal this finding and its underlying mechanisms: (1) relative abundance index (RAI) and detection  
48 probability inference from long-term camera-trapping efforts, (2) empirical dynamic modeling to infer  
49 causal interspecies relationships from RAI data, (3) diet analysis of predators from fecal samples, and (4)  
50 daily activity cycle analysis to study behavior.

## 51 RESULTS

52 From 2010 to 2017, 176446 pictures were collected in Jasper Ridge Biological Preserve (JRBP; Stanford,  
53 CA) in a total of 39621 trap days, with 9 cameras starting in 2010 (7-year dataset) and 16 in 2012 (5-year  
54 dataset), the latter set covering the preserve more extensively. Wildlife was captured in 50% of the  
55 photos, 29% contained humans and 21% were blank. We extracted independent photographic events for  
56 11 mid-large animal species, but chose to focus on 5 species hypothesized to be part of a food web: puma,  
57 mule deer, coyote, bobcat (*Lynx rufus*), and gray fox (*Urocyon cinereoargenteus*) (Table 1).

58 **Table 1. Number of independent photographic events recorded per species in both 7-year and 5-year datasets. Species are**  
59 **ranked in decreasing order of number of events in the 5-year dataset. Last column indicates the number of scats sequenced**  
60 **per species.**

|                       | # of events<br>in 7-year dataset | # of events<br>in 5-year dataset | Scat samples<br>sequenced per species |
|-----------------------|----------------------------------|----------------------------------|---------------------------------------|
| <b>Mule deer</b>      | 11595                            | 11996                            | NA                                    |
| <b>Coyote</b>         | 3190                             | 2166                             | 11                                    |
| <b>Bobcat</b>         | 679                              | 1140                             | 29                                    |
| <b>Puma</b>           | 436                              | 1046                             | 13                                    |
| <b>Gray fox</b>       | 330                              | 452                              | 46                                    |
| <b>All 11 species</b> | 20928                            | 25353                            | 99                                    |

61  
62 The RAI and detection probability time series showed a substantial increase in pumas within an 18-month  
63 interval, which then stabilized (time points T1-T2 in Figure 1, S1 and S2). During that period, the RAI of  
64 mule deer and coyote decreased, and both were relatively stable after three years (T3). During this shift,  
65 the RAI of gray foxes increased substantially. Bobcats on the other hand, kept a similar detection  
66 probability (Figure S2) and RAI in the 7-year dataset, but the latter differed substantially from the 5-year  
67 RAI curve. Such inconsistency can be explained by the biased spatial coverage of the 7-year dataset. We  
68 also looked at coyote group size over time and found that events involving more than one individual were  
69 frequent before 2012 and subsequently declined, such that almost all coyotes are now observed as  
70 individuals (Figure S4).

71

BioRxiv Preprint

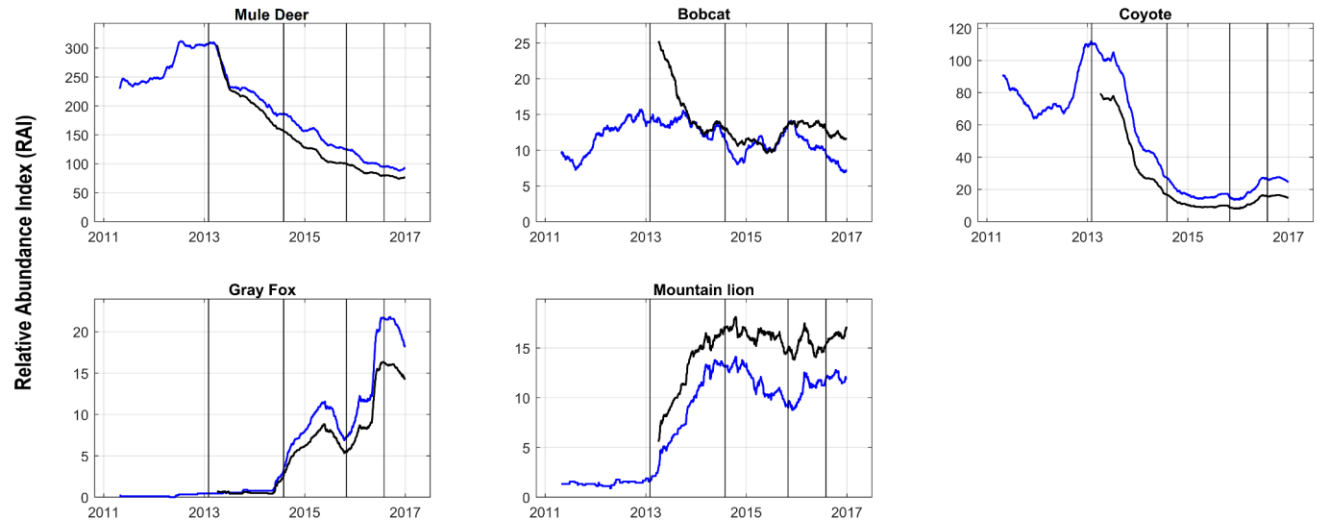

72

73 **Figure 1. Relative Abundance Index (RAI) per year of the five species included in the 7-year (blue) and 5-year (black) datasets.**

74 **Vertical lines correspond to selected time points T1 to T4: T1: 01-02-2013; T2: 01-08-2014; T3: 01-11-2015; T4: 01-08-2016.**

75 In order to investigate causal relationships between the five species, we conducted an empirical dynamic  
76 modeling (EDM) approach called convergent cross-mapping (CCM)<sup>18</sup> (Figure 2 and S3). This approach uses  
77 time series to reconstruct the dynamics of a system by constructing a state-space manifold using only the  
78 time series of the hypothesized response variable (*e.g.*, deer RAI). This manifold is then used to infer the  
79 time series of the driver (*e.g.*, puma RAI). If the inferred driver time series matches the observed driver  
80 time series (measured by cross-mapping skill and convergence), then CCM suggests that there is a causal  
81 relationship between the hypothesized driver and response variable (see Methods for details). The results  
82 primarily show that abundance of puma drives that of deer, coyote and gray fox (Figure 2a, 2b and 2d).  
83 There is some evidence of bottom-up feedback as well, although generally top-down regulation is stronger  
84 (higher cross-mapping skill). There seems to be a causal relationship between the canids as well (Figure  
85 2e); however, the results from the 5-year dataset were not significant (Figure S3e). There is no significant  
86 relationship between bobcats and puma, and bobcats and coyotes (Figure 2c and 2f).

87

BioRxiv Preprint

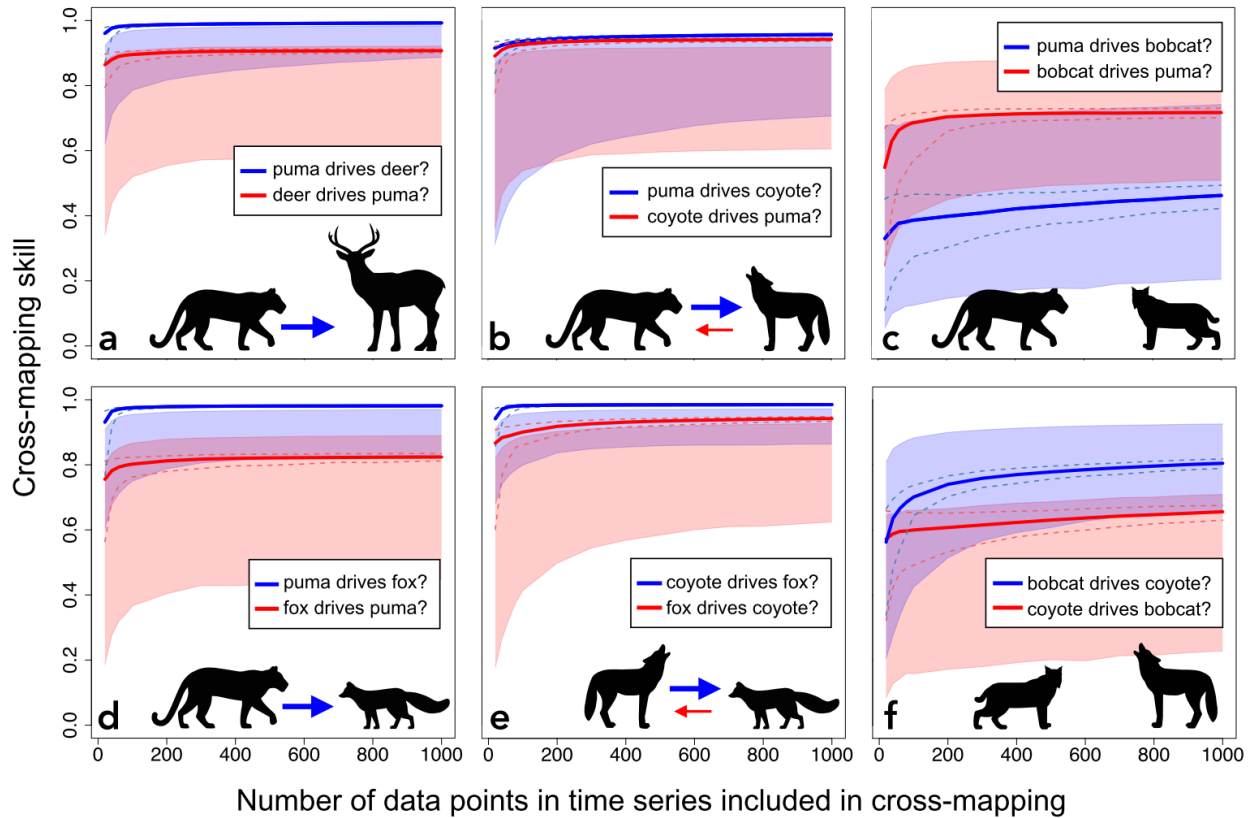

88

89 **Figure 2. Inference of causal relationships between species. (a-f) CCM analyses of RAI from the 7-year dataset (see Figure S3**  
 90 **for the 5-year dataset). In general, top-down regulation (blue lines) has a higher cross-mapping skill than bottom-up regulation**  
 91 **(red lines). Dashed lines represent the 2.5th and 97.5th quantiles of bootstrapped time series fragments. The number of data**  
 92 **points refers to the length of the time series fragments used for cross-mapping. The cross-mapping skill is the Pearson's**  
 93 **correlation coefficient between observed and predicted values of the driver using the manifold constructed from the response**  
 94 **variable. The shaded regions represent the 0th and 95th percentiles (95% upper one-sided bound) of the CCM null distributions**  
 95 **(1000 runs of randomized time series). Arrows indicate the direction of causality based on significant CCM results ( $p < 0.05$ ).**

BioRxiv Preprint

96 **Larger arrows indicate stronger drivers (higher cross-mapping skill). All cross-mappings showed significant convergence**  
97 **(Kendall's test  $\tau > 0$  and  $p < 0.01$ ). (g) Relationships between species based on CCM and diet analysis.**

98 Mule deer DNA was present in all puma scat (Frequency of Occurrence; FOO=1), dominating the diet.  
99 Coyote was also found in puma's diet (FOO=0.08). The diet of the coyote overlaps by 45% with the puma  
100 (See Table S3) and mostly consisted of rodents (Operational Taxonomic Unit; OTUs=4; FOO=0.09-0.64),  
101 deer (FOO=0.27), and lagomorphs (OTUs=2; FOO=0.09-0.36). Gray fox and bobcats mainly consumed  
102 small mammals (rodents and lagomorphs) and overlap substantially with the coyote (71 and 74%  
103 respectively), but not with the puma (14 and 19% respectively).

104 Finally, we found that multiple species changed their daily activity cycle after the increased abundance of  
105 puma (T3) compared to before (T1). Mule deer (Figure 3 and S7-8) became 42% less active at night,  
106 compensated by an increase in activity at dawn and before dusk. Coyotes became 27% more active during  
107 the day (Figure 3). Bobcat and puma activity remained largely unchanged and predominantly nocturnal  
108 (Figure S6 and S9).

109

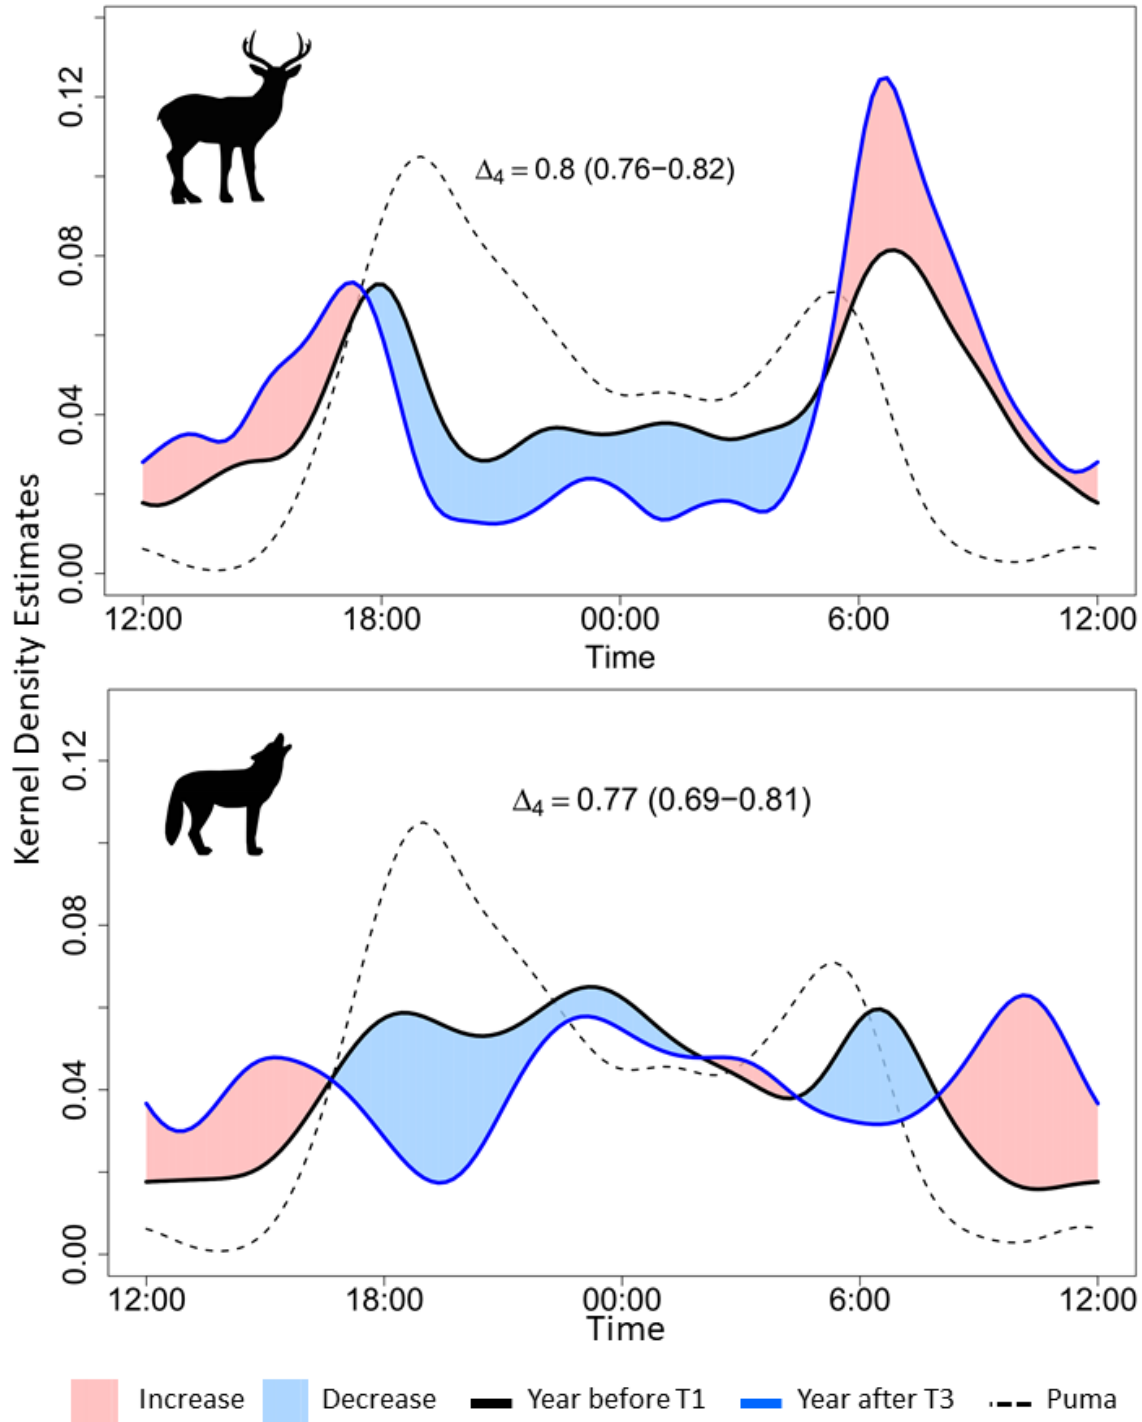

110

111 **Figure 3. Kernel density estimates of daily activity patterns of mule deer (top) and coyote (bottom) between the year before**  
112 **T1 (return of resident pumas, black line) and the year after T3 (Coyote reach an equilibrium, blue line), from the 7-year**  
113 **dataset. Shaded areas correspond to increases or decreases in daily activity between these two years. Dashed line**  
114 **corresponds to the daily activity pattern of puma the year after T3. Overlap coefficient  $\Delta_4$  between the two years varies**  
115 **between 0 (no overlap) and 1 (complete overlap). 95% confidence interval obtained with 1000 bootstraps is given in**  
116 **parentheses.**



## 117 DISCUSSION

118 Pumas natural return to JRBP in 2013 caused a trophic cascade that is strongly supported by multiple lines  
119 of evidence. First, time series of RAI and detection probability show a strong increase in pumas in just 18  
120 months and an immediate, coincident decrease in mule deer and coyotes (59% and 86% decrease in RAI  
121 respectively in 33 months between T1 and T3). Coyote group sizes also declined, indicating they became  
122 more transient than resident<sup>8</sup>. By provoking the decline of coyotes, which were the prior dominant  
123 predator in the preserve, pumas have allowed smaller carnivores such as gray foxes to fill the canid  
124 niche<sup>19-22</sup>. Second, convergent cross-mapping validates that the pumas are exerting a top-down influence  
125 on this cascade. Third, fecal DNA analyses of pumas demonstrate that their primary prey is deer and  
126 occasionally coyotes. Fourth, dietary preference of deer, and even coyote, by pumas is corroborated by  
127 the 'ecology of fear'<sup>23</sup> we see in the divergent diurnal activity of deer and coyote following the rise of  
128 puma in our study: deer and coyote are less active during nightly periods of higher puma activity. The  
129 response of bobcats to pumas remains ambiguous as previously reported in the region<sup>17,24</sup>. However,  
130 unlike the other species, the bobcat results depend on which dataset we use. The RAI and CCM indicate a  
131 direct interaction between bobcats and pumas in the 5-years dataset, but not in the 7-year dataset, which  
132 we interpret as a difference in the particular placement of the newer cameras in areas preferred by  
133 bobcats. Importantly, bobcat diet almost exclusively contains small rodents and lagomorphs, suggesting  
134 no direct competition for food with the puma.

135 The trophic recovery may have other indirect effects on the ecosystem. Our results confirm that coyote  
136 infrequently consume large herbivores and favor smaller mammals<sup>25</sup>, while the puma diet is dominated  
137 by mule deer (as documented elsewhere in California<sup>26</sup>). This puma-mediated suppression of large  
138 herbivores may thus impact plant diversity and demography<sup>27</sup>. While we do not have data to support this  
139 effect here, the noticeable absence of browsing at sites where pumas are most frequently present could  
140 impact tree regeneration, which has been documented elsewhere to be induced by a landscape of fear<sup>28</sup>.  
141 Similarly, we noted the presence of seeds in all of the gray fox scat, which may play a large role in seed  
142 dispersal<sup>29</sup>, both in abundance and distribution as gray foxes become more common. Finally, by hunting  
143 mule deer, pumas generate an increasing number of carcasses, which are sources of food for carrion-  
144 dependent invertebrates<sup>30</sup>, smaller predators and scavenger birds such as turkey vultures<sup>31</sup>. Mule deer  
145 DNA found in the diet of all mesopredators could thus be explained by consumption of carcasses.  
146 Moreover, cameras deliberately set at deer carcasses observed this menagerie of scavengers, culminating  
147 with visits by turkey vultures, which have been increasing in the preserve (Figure S5).

## BioRxiv Preprint

148 The dense and permanent infrastructure of camera traps presented here has allowed us to document a  
149 trophic cascade with an unprecedented level of detail. While this type of monitoring is not feasible  
150 everywhere, there are no technical barriers to its spread in suburban environments.

151 Most importantly, our study shows that small biological islands should not be abandoned in these highly  
152 fragmented landscapes dominated by humans. We show that trophic recovery in such landscapes is  
153 possible over a short period of time, provided the conditions favoring these large predators are met<sup>11,17,32</sup>.  
154 In this preserve, these conditions might include a limited public and vehicle access, low human density  
155 and being unused at night. In addition, the preserve is in close proximity to the Santa Cruz Mountains,  
156 which are largely protected from urbanization and have an abundance of pumas<sup>15,17,31</sup>. Finally,  
157 surrounding residential areas are of low density, typically unfenced, and replete with tree-lined drainages.  
158 These conditions seem to allow the puma to dominate the adaptable and synanthropic coyote, which has  
159 otherwise significantly expanded its distribution across North America as a result of the extirpation of  
160 larger predators<sup>33,34</sup>. As such, small suburban preserves are not only refuges for rare species<sup>35</sup>, they also  
161 support functional ecosystems where the top-down forcing of an apex predator can be realized. In the  
162 Anthropocene, these protected areas have a decisive role to play in stopping the erosion of biodiversity  
163 and, therefore, must be given immediate priority in conservation.

## 164 METHODS

### 165 Study area and camera traps

166 Jasper Ridge Biological Preserve (JRBP; Stanford, CA) covers a surface of 4.9 km<sup>2</sup> in the vicinity of the Santa  
167 Cruz mountains. It is a partially fenced preserve, not accessible to the public and with limited usage of  
168 motor vehicles. Fourteen Buckeye Orion and 4 Buckeye X7D wireless camera traps were installed between  
169 2009 and 2015 to serve multiple purposes and did not follow a probability-based sampling design. The  
170 initial setup served as a proof of concept for wireless system and was used to monitor for human  
171 trespassers as well as wildlife before pumas were first observed. The cameras were installed at strategic  
172 locations, usually trail intersections and sections of trail passing through geographic choke points to  
173 maximize detection of wildlife. Four of the cameras were placed specifically to serve as repeater cameras,  
174 which relayed the wireless signals around topographic obstacles. Fourteen of the cameras were equipped  
175 with solar panels while the remaining 4 were in locations with virtually no solar exposure and ran on  
176 batteries alone, which had to be changed every few months. The wireless cameras are managed via a  
177 computer-based software interface which allows the user to remotely configure and control the camera

BioRxiv Preprint

178 as well as view battery level and wireless signal quality. Camera status was monitored daily and battery  
179 health maximized by avoiding discharging the batteries below 50% whenever possible. As a result, all of  
180 the cameras have been continuously in operation with few and insignificant gaps in service. Automated  
181 scripting was used to copy the photos to a server located offsite for processing and backup. A custom  
182 web-based tagging interface was created and used by a group of volunteers to label species captured in  
183 each photo. The classified photos were then rechecked by at least one other person.

184

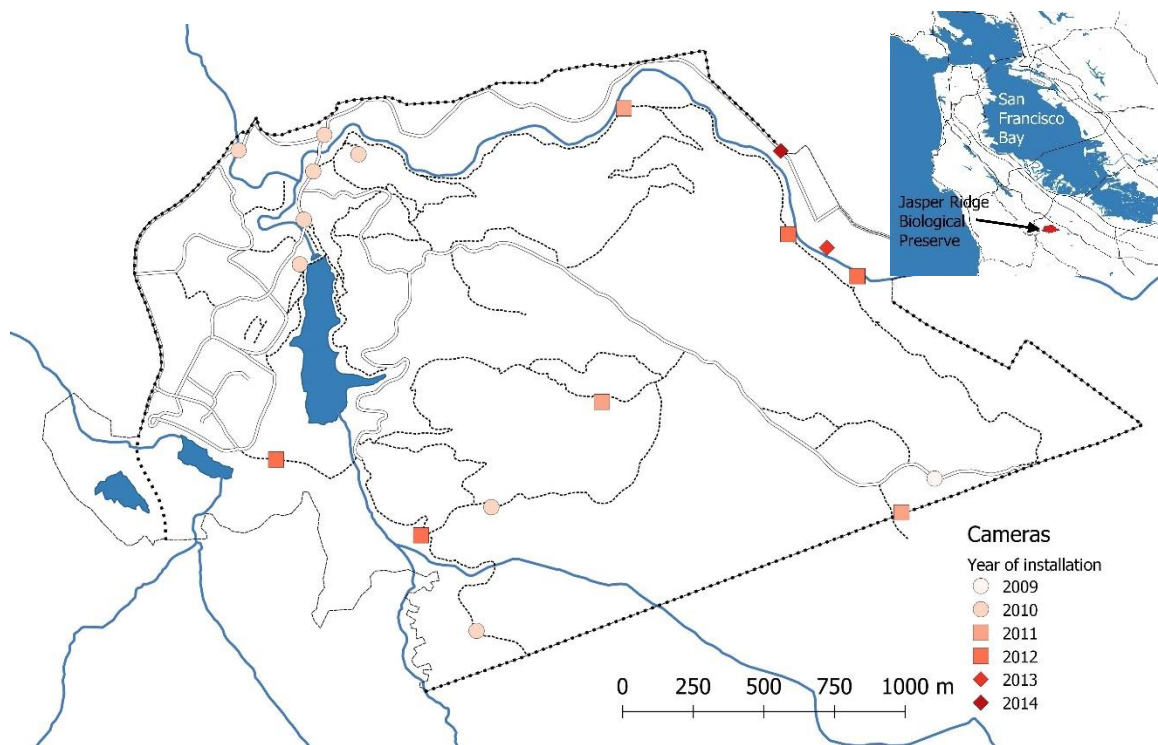

185

186 **Figure 3. Map of Jasper Ridge Biological Preserve, Stanford, CA. Points corresponds to camera locations and are categorized**  
187 **by year of installation. Circular points correspond to the 7-year dataset while the combination of circular and squared points**  
188 **correspond to the 5-year dataset.**

189 Filtering Camera-Trapping Data

190 Out of all species recorded, we focused on 11 of them and discarded flying birds, mammals with a mass  
191 smaller than 0.5 kg and species recorded less than 50 times over the whole survey. The species considered  
192 are: black-tailed jackrabbit (*Lepus californicus*), bobcat (*Lynx rufus*), brush rabbit (*Sylvilagus bachmani*),  
193 coyote (*Canis latrans*), gray fox (*Urocyon cin ereoargenteus*), mule deer (*Odocoileus hemionus*), puma  
194 (*Puma concolor*), raccoon (*Procyon lotor*), striped skunk (*Mephitis mephitis*), Virginia opossum (*Didelphis*  
195 *virginiana*) and wild turkey (*Meleagris gallopavo*).

## BioRxiv Preprint

196 Photographic events of the same species were considered independent if they occurred more than 30 min  
197 after the previous photo of that species at the same camera<sup>17</sup>. Pictures containing multiple individuals  
198 were also treated as one event. Because camera traps were installed progressively over time, we decided  
199 to define 2 datasets for our analysis. The first contains the records of 9 cameras from October 26, 2010  
200 until June 30, 2017, referred to as the 7-year dataset. The second contains the records of 16 cameras from  
201 October 2, 2012 until June 30, 2017, referred to as the 5-year dataset.

### 202 Species Relative Abundance and Detectability

203 We calculated the relative abundance index (RAI) as the number of events per camera trap per year. RAI  
204 was thus calculated for each day with a 1 year moving window for both the 7-year and 5-year datasets. In  
205 addition, we calculated the detection probability using the R package unmarked<sup>36</sup>. Detection/No-  
206 detection per camera were calculated in periods of 1 week for both datasets. Detection probability was  
207 then calculated for periods of 1 year (52 weeks) with a step of one week.

### 208 Empirical Dynamic Modeling

209 We used the RAI time series to perform empirical dynamic modeling (EDM); an approach that detects  
210 putative causal relationships in nonlinear systems<sup>18</sup>. First, we standardized the time series to zero mean  
211 and unit variance for unbiased comparability between species abundance. Next, we used an EDM method  
212 called convergent cross-mapping (CCM)<sup>18</sup> with simplex projection<sup>37</sup> to infer causal relationships between  
213 species. CCM cannot, however, distinguish between the different types of relationships, *e.g.*, competition  
214 *versus* predator-prey dynamics, or how abundance is mediated (*e.g.*, through birth-death processes,  
215 change in diel activity, or migration). However, we also conducted diet and behavioral analyses to address  
216 this gap.

217 The CCM method uses time series of different variables (*e.g.*, different species RAI) to reconstruct  
218 dynamics of a system by constructing a state-space manifold. Here, the manifold represents the different  
219 states of the ecosystem of the species included in this study. This method uses the property of *Takens'*  
220 *Theorem*<sup>38</sup>, which states that a manifold,  $M$ , representing a system can also be reconstructed using just  
221 one of the variables (*e.g.*, puma RAI) lagged against itself (*e.g.*,  $X(t)$ ,  $X(t-\tau)$ ,  $X(t-2\tau)$  for variable  $X$  and time  
222 lag  $\tau$ ). This creates a univariate shadow manifold  $M_X$  that preserves the properties of the original manifold  
223  $M$ . CCM detects causal relationships between variables  $X$  and  $Y$  by comparing local points  $x(t)$  and  $y(t)$  on  
224 shadow manifolds  $M_X$  and  $M_Y$ , respectively<sup>18</sup>. For example, if puma is driving deer RAI, either through

## BioRxiv Preprint

225 predation or by changing deer behavior, then information about puma RAI will be embedded in the  
226 dynamics of deer RAI, such that the shadow manifold  $M_{deer}$  can reconstruct past values of puma RAI.

227 The first step of EDM was to construct a univariate shadow manifold from each individual time series. The  
228 optimal number of lagged times series plus the original time series—i.e., the embedding dimension  $E$  used  
229 to construct the manifold—was obtained by performing a nearest-neighbor prediction method called  
230 simplex projection<sup>37</sup>. The  $E$  that generated the highest prediction skill  $\rho$  (Pearson's correlation coefficient  
231 between observed and predicted values using simplex projection), was chosen for the reconstruction of  
232 shadow manifolds to be compared (cross-mapped) when performing CCM. The cross-mapping between  
233 the dynamics of a putative driver (*e.g.*, puma abundance) and the dynamics of a putative response variable  
234 (*e.g.*, deer abundance) is, again, performed using simplex projection. If there is a causal signal in the data,  
235 then the longer the time series, the denser the shadow manifold becomes, and the shorter the distance  
236 between nearest-neighbors becomes, leading to higher prediction skill. This phenomenon, called  
237 *convergence*, is an essential criterion for CCM to detect causal relationships.

238 We used a null model to assess the significance of the CCM results for causality between a pair of variables  
239 (*i.e.*, a pair of species RAI). For the null model we created several randomized surrogate time series of the  
240 putative driver variable for the cross-mapping, losing any signal of causality if present in the original time  
241 series. To account for spurious predictability just based on neighboring time-dependence (*i.e.*, serial  
242 correlation) we used a strict null model that conserved any autocorrelation in each surrogate time series  
243 by Fourier-transforming the time series and only randomizing the phases before re-transforming the time  
244 series back to its original form. This is known as the Ebisuzaki method<sup>39</sup>. We obtained a null distribution  
245 with 95% confidence intervals from 1000 surrogates with randomized Fourier phases, and compared its  
246 CCM model performance with the true time series using a right-tailed z-test to obtain the p-value<sup>40</sup>. The  
247 variance (95% confidence intervals) of the CCM performance with the true time series was obtained from  
248 1000 bootstraps of different time series lengths from randomized time series locations. In addition, to  
249 test the significance of convergence, we used the Kendall's test<sup>41</sup>, which tests whether the cross-mapping  
250 skill  $\rho$  is significantly higher when using the whole time series compared to just one time point (if the  
251 statistic  $\tau > 0$  and  $p < 0.01$  then convergence is significant). All EDM analyses were performed using the  
252 rEDM package in R<sup>42</sup>.

## 253 Fecal Sample Collection & Preservation

254 Fecal samples were collected from October 2017 – April 2018 covering 32 paths (trails 17 km; roads 7 km)  
255 within JRBP. In total, over 175 km of trails were traversed over 23 collection days. Whole scat samples  
256 were collected in sterile bags and using gloves to avoid contamination. All samples were stored at -20C  
257 until DNA extraction. Over the wet and dry season, 157 predator scat samples were collected (puma=15,  
258 coyote=11, bobcat=49, grey fox=82).

## 259 DNA extraction, amplification and sequencing

260 Scat samples were thawed, homogenized and processed (~0.2 mg) utilizing Zymo Quick-DNA Fecal/Soil  
261 Miniprep Kit<sup>43</sup>. Samples were processed in small batches (~ 14) with an extraction blank to monitor for  
262 potential cross-contamination in the laboratory. The eluted DNA was quantified using Nanodrop 2000  
263 (Thermo Fisher Scientific Inc).

264 Metabarcoding primers for the 12S mtDNA were selected that amplify DNA from a wide range of mammal  
265 species that are well represented in public databases. The MiMammal-U primers were used to amplify  
266 mammals specifically and modified with the Illumina adaptor preceding the target primers and separated  
267 by 6-N spacers<sup>44</sup>. The PCR comprised 20 µl: 10 µl of GoTaq<sup>®</sup> Colorless Master Mix (400µM dATP, 400µM  
268 dGTP, 400µM dCTP, 400µM dTTP and 3mM MgCl<sub>2</sub>), 1 µL of each primer (5mM), 4 µl of DNA template and  
269 4 µl of H<sub>2</sub>O. Cycling conditions used initial denaturing at 95°C for 10 min, followed by 35 cycles of  
270 denaturing at 95°C for 30 s, annealing at 60°C for 30 s and extension at 72°C for 10 s. After visualization  
271 on a gel, PCR amplicons were purified using the QIAquick PCR Purification Kit (Qiagen).

272 For indexing, appropriate Illumina barcodes were ligated to each sample. The index PCR was performed  
273 as 20 µl reaction: 10µl of Amplitaq Gold reactions (with 2.5 mM MgCl<sub>2</sub>, 200 IM each dNTP, 0.1 mg/mL BSA,  
274 4% DMSO) 1.2 µl (of each primer), 1.6 µl of DNA amplicons and 6µl of H<sub>2</sub>O. Cycling conditions used initial  
275 denaturing at 95°C for 10 min, followed by 15 cycles of denaturing at 95°C for 30 s, annealing at 50°C for  
276 30 s and extension at 72°C for 10 s.

277 The indexed second PCR products (n=118) were quantified and assessed for quality control and  
278 quantifying amplicon DNA yields using the Fragment Analyzer, normalized to equimolar concentrations  
279 and pooled together before purification using QIAquick PCR Purification Kit (Qiagen).

280 Sequencing was performed on a Miseq platform using the Reagent Kit Nano v3 for 2 x 300 bp PE (Illumina,  
281 San Diego, CA, USA) and run at Stanford University PAN Facility. A 30% PhiX DNA spike-in control was

BioRxiv Preprint

282 added to improve the data quality of low diversity samples such as single PCR amplicons used in this study.  
283 Samples were pooled with other projects on 2 Miseq runs, generating a total of 25,370,906 reads, or on  
284 average 256,271 reads per samples.

285 *DNA metabarcoding, demultiplexing, quality control, and species identification*

286 We used the software packages Obitools<sup>45</sup> and R (R Core Development Team 2013) for demultiplexing and  
287 quality control. Each sequence was assigned to its sample of origin based on exact matches to both  
288 multiplex identifier (MID) tags. Sequences were paired with Obitools *illuminapairedend* and aligned  
289 sequences with a score <40 were discarded. Forward and reverse adapters were then removed in  
290 Cutadapt<sup>46</sup>. After assignment of sequences to their corresponding samples, we used *obiuniq* to dereplicate  
291 reads into unique sequences, eliminated potential PCR and sequencing errors with *obiclean*, and kept only  
292 sequences occurring at least 10 times.

293 Taxonomic assignment of sequences was done against a custom reference database. First, we  
294 downloaded all standard mammal, human, mouse and vertebrate sequences from embi  
295 (<http://ftp.ebi.ac.uk/pub/databases/embl/release/std/>) and converted recovered file to ecoPCR format.  
296 EcoPCR was then used to simulate an in-silico PCR, using the Mimammal-U primers and maximum 3  
297 mismatches. *Ecotag* was then used to identify dietary sequence, while inspecting and revising taxonomic  
298 assignments to ensure validity. Sequences with poor matches to reference database (<95%) were  
299 removed. After quality control, our final data consisted of 99 samples for the diet analysis (puma=13,  
300 coyote=11, bobcat=30, grey fox=45).

301 Diet composition was quantified using Sequence Occurrence (*i.e.*, presence/absence) which when  
302 averaged across all samples yields relative frequency of occurrence (FOO) and the mean sequence Relative  
303 Read Abundance (RRA) range defined as the proportion of unique Illumina sequence reads in a sample  
304 divided by the final (*i.e.*, after quality control & removal of host species reads) number of sequence reads  
305 in that sample<sup>43</sup>.

306 We used Pianka's adaptation of the niche overlap ( $O_{jk}$ ) metric to determine diet overlap among all pairs  
307 of target carnivores<sup>47</sup>:

$$\hat{O}_{jk} = \frac{\sum_i^n \hat{p}_{ij} \hat{p}_{ik}}{\sqrt{\sum_i^n \hat{p}_{ij}^2 \sum_i^n \hat{p}_{ik}^2}}$$

308

## BioRxiv Preprint

309 Whereas  $p_{ij}$  is the proportion of prey species  $i$  in carnivore species  $j$  diet,  $p_{ik}$  is the proportion prey species  
310  $i$  in carnivore species  $k$  diet,  $n$  = Total number of available prey species and  $O_{jk} = 0$  represents no overlap,  
311 whereas a value of  $O_{jk} = 1$  represents complete overlap.

## 312 Daily Activity Cycle

313 We looked for changes in daily activity cycle over time by measuring the overlap of activity between  
314 species (predator-prey). Because daily activity cycle of mammals depends largely on daylight rather than  
315 time of day, we considered the seasonal patterns in sunlight. To do so, we standardized all recording times  
316 in a standard day where sunrise, solar noon, sunset and solar midnight are set as 6am, 12pm, 6pm and  
317 12am respectively. We obtained time of sun cycle for Stanford, CA, from the Astronomical Applications  
318 Department of the U.S. Naval Observatory ([http://aa.usno.navy.mil/data/docs/RS\\_OneYear.php](http://aa.usno.navy.mil/data/docs/RS_OneYear.php)). We  
319 then rescaled the times of pictures recording into the standardized day depending on the day of  
320 observation. Our standardized daily activity cycle is thus representative of the control of daylight on  
321 animals' activity. Next, we used the R package *overlap*<sup>48</sup> to plot patterns of daily activity cycle. The overlap  
322 varies between 0 (no overlap of time of activity) and 1 (complete overlap of time of activity). Confidence  
323 intervals of 95% for the overlap were estimated with 1000 bootstraps. First, we looked for changes in daily  
324 activity cycle for the same species between the year before the cascade (T1) and the year after (T3).  
325 Second, we looked for changes of daily activity cycle within a species over time. For each species, we thus  
326 used the first 12 months to define a reference year and then compared it with each successive year, with  
327 a step of 1 month. Finally, we compared the daily activity cycle of predators and their prey. In some cases,  
328 there were not enough observations per species per year to produce an accurate representation of their  
329 daily activity cycle and we decided not to include them in the results. In addition, we considered that a  
330 minimum of 50 observations were necessary to use  $\Delta_4$ , and resorted to  $\Delta_1$  otherwise<sup>49</sup>.

## 331 ACKNOWLEDGMENTS

332 We would like to thank all the Jasper Ridge Biological Preserve docent volunteers who helped to identify  
333 the animals on pictures. We would also like to thank Alina Isakova for her help during the diet analysis,  
334 Fred Boyer for helping us troubleshooting Obitools, and Ethan Deyle for helpful guidance on empirical  
335 dynamic modeling. We also thank Rodolfo Dirzo for initiating the camera-trapping project at Jasper Ridge  
336 Biological Preserve.

337 K.L. was funded by an Early Postdoc Mobility grant from the Swiss National Science Foundation  
338 (P2ELP3\_175075) and JRBP Kennedy Fund. N.N. was funded by The Bing Fellowship in Honor of Paul



BioRxiv Preprint

339 Ehrlich. J.M. was funded by the Philippe Cohen Graduate Research Fellowship. The Jasper Ridge wireless  
340 camera traps and supporting infrastructure were paid for by National Science Foundation (grant number  
341 0934210).

342

343 **Contributions:**

344 K.L. performed the camera trap analyses, the bioinformatic part of the DNA metabarcoding, and wrote  
345 the initial draft. J.M. performed the fecal diet analysis. T.H. maintained the camera traps and curated the  
346 database. N.N. performed the empirical dynamic modeling and created the artwork in Figure 2. E.A.H.  
347 designed and supervised the project. All authors contributed to the writing of the paper.

348 **REFERENCES**

- 349 1. Estes, J. A. *et al.* Trophic Downgrading of Planet Earth. *Science (80-. )*. **333**, 301 LP-306 (2011).
- 350 2. Ripple, W. J. *et al.* Status and ecological effects of the world’s largest carnivores. *Science* **343**,  
351 (2014).
- 352 3. Ray, J. C., Redford, K. H., Steneck, R. & Berger, J. Conclusion: is large carnivore conservation  
353 equivalent to biodiversity and how can we acheive both? in *Large carnivores and the conservation*  
354 *of biodiversity*. 400–427 (2005).
- 355 4. Ripple, W. J. *et al.* What is a Trophic Cascade? *Trends Ecol. Evol.* **31**, 842–849 (2016).
- 356 5. Poisot, T., Mouquet, N. & Gravel, D. Trophic complementarity drives the biodiversity-ecosystem  
357 functioning relationship in food webs. *Ecol. Lett.* **16**, 853–861 (2013).
- 358 6. Ritchie, E. G. & Johnson, C. N. Predator interactions, mesopredator release and biodiversity  
359 conservation. *Ecol. Lett.* (2009). doi:10.1111/j.1461-0248.2009.01347.x
- 360 7. de Satgé, J., Teichman, K. & Cristescu, B. Competition and coexistence in a small carnivore guild.  
361 *Oecologia* **184**, 873–884 (2017).
- 362 8. Berger, K. M., Gese, E. M. & Berger, J. Indirect effects and traditional trophic cascades: A test  
363 involving wolves, coyotes, and pronghorn. *Ecology* **89**, 818–828 (2008).
- 364 9. Suraci, J. P., Clinchy, M., Dill, L. M., Roberts, D. & Zannette, L. Y. Fear of large carnivores causes a  
365 trophic cascade. *Nat. Commun.* **7**, (2016).
- 366 10. Ripple, W. J. & Beschta, R. L. Trophic cascades in Yellowstone: The first 15years after wolf  
367 reintroduction. *Biol. Conserv.* (2012). doi:10.1016/j.biocon.2011.11.005
- 368 11. Ripple, W. J. & Beschta, R. L. Linking a cougar decline, trophic cascade, and catastrophic regime  
369 shift in Zion National Park. *Biol. Conserv.* **133**, 397–408 (2006).
- 370 12. Ripple, W. J. & Beschta, R. L. Trophic cascades involving cougar, mule deer, and black oaks in

BioRxiv Preprint

- 371 Yosemite National Park. *Biol. Conserv.* (2008). doi:10.1016/j.biocon.2008.02.028
- 372 13. Binkley, D., Moore, M. M., Romme, W. H. & Brown, P. M. Was Aldo Leopold right about the Kaibab  
373 Deer herd? *Ecosystems* (2006). doi:10.1007/s10021-005-0100-z
- 374 14. Astete, S. *et al.* Forced neighbours: Coexistence between jaguars and pumas in a harsh  
375 environment. *J. Arid Environ.* **146**, 27–34 (2017).
- 376 15. Vickers, T. W. *et al.* Survival and mortality of pumas (*Puma concolor*) in a fragmented, urbanizing  
377 landscape. *PLoS One* **10**, (2015).
- 378 16. Lambert, C. M. *et al.* Cougar Population Dynamics and Viability in the Pacific Northwest. *J. Wildl.*  
379 *Manage.* **70**, 246–254 (2006).
- 380 17. Wang, Y., Allen, M. L. & Wilmsers, C. C. Mesopredator spatial and temporal responses to large  
381 predators and human development in the Santa Cruz Mountains of California. *Biol. Conserv.* **190**,  
382 23–33 (2015).
- 383 18. Sugihara, G. *et al.* Detecting Causality in Complex Ecosystems. *Science* (80-. ). **338**, 496–500 (2012).
- 384 19. Farias, V., Fuller, T. K., Wayne, R. K. & Sauvajot, R. M. Survival and cause-specific mortality of gray  
385 foxes (*Urocyon cinereoargenteus*) in southern California. *J. Zool.* (2005).  
386 doi:10.1017/S0952836905006850
- 387 20. Bonell Rojas, W. Y., Alvarez Rincon, M. A. & Roncancio Duque, N. J. Ecological niche and occupation  
388 by gray fox (*Urocyon cinereoargenteus*) at Las Barajitas Canyon, Sonora. *Therya* (2018).  
389 doi:10.12933/therya-18-546
- 390 21. Levi, T. & Wilmsers, C. C. Wolves-coyotes-foxes: A cascade among carnivores. *Ecology* (2012).  
391 doi:10.1890/11-0165.1
- 392 22. Smith, J. A., Thomas, A. C., Levi, T., Wang, Y. & Wilmsers, C. C. Human activity reduces niche  
393 partitioning among three widespread mesocarnivores. *Oikos* **127**, 890–901 (2018).
- 394 23. Lima, S. L. & Dill, L. M. Behavioral decisions made under the risk of predation: a review and  
395 prospectus. *Can. J. Zool.* **68**, 619–640 (1990).
- 396 24. Hass, C. C. Competition and coexistence in sympatric bobcats and pumas. *J. Zool.* **278**, 174–180  
397 (2009).
- 398 25. Arjo, W. M., Pletscher, D. H. & Ream, R. R. Dietary Overlap Between Wolves and Coyotes in  
399 Northwestern Montana. *J. Mammal.* **83**, 754–766 (2002).
- 400 26. Allen, M. L., Elbroch, M. L., Casady, D. S. & Wittimer, H. U. Feeding and spatial ecology of mountain  
401 lions in the Mendocino National Forest, California. *Calif. Fish Game* (2015).
- 402 27. Schmitz, O. J., Hambäck, P. A. & Beckerman, A. P. Trophic Cascades in Terrestrial Systems: A Review  
403 of the Effects of Carnivore Removals on Plants. *Am. Nat.* **155**, 141–153 (2000).
- 404 28. Bakker, E. S. *et al.* Combining paleo-data and modern exclosure experiments to assess the impact  
405 of megafauna extinctions on woody vegetation. *Proc. Natl. Acad. Sci.* (2016).  
406 doi:10.1073/pnas.1502545112
- 407 29. Wilson, J. A. & Thomas, B. Diet and seed dispersal efficiency of the gray fox (*Urocyon*  
408 *cinereoargenteus*) in chaparral. *Bull. South. Calif. Acad. Sci.* **98**, 119–126 (1999).

BioRxiv Preprint

- 409 30. Barry, J. M. *et al.* Pumas as ecosystem engineers: ungulate carcasses support beetle assemblages  
410 in the Greater Yellowstone Ecosystem. *Oecologia* (2018). doi:10.1007/s00442-018-4315-z
- 411 31. Mark Elbroch, L. & Wittmer, H. U. Table scraps: Inter-trophic food provisioning by pumas. *Biol. Lett.*  
412 **8**, 776–779 (2012).
- 413 32. Smith, J. A., Wang, Y. & Wilmers, C. C. Top carnivores increase their kill rates on prey as a response  
414 to human-induced fear. *Proc. R. Soc. B Biol. Sci.* **282**, (2015).
- 415 33. Hody, J. W. & Kays, R. Mapping the expansion of coyotes (*Canis latrans*) across America. *Zookeys*  
416 **97**, 81–97 (2018).
- 417 34. Bergstrom, B. J. Carnivore conservation: Shifting the paradigm from control to coexistence. *J.*  
418 *Mammal.* (2017). doi:10.1093/jmammal/gyw185
- 419 35. Wintle, B. A. *et al.* Global synthesis of conservation studies reveals the importance of small habitat  
420 patches for biodiversity. *Proc. Natl. Acad. Sci.* 201813051 (2018). doi:10.1073/pnas.1813051115
- 421 36. Fiske, I. & Chandler, R. **unmarked** : An R Package for Fitting Hierarchical Models of Wildlife  
422 Occurrence and Abundance. *J. Stat. Softw.* **43**, (2011).
- 423 37. Sugihara, G. & May, R. M. Nonlinear forecasting as a way of distinguishing chaos from  
424 measurement error in time series. *Nature* **344**, 734–741 (1990).
- 425 38. Takens, F. Detecting strange attractors in turbulence. in *Dynamical Systems and Turbulence,*  
426 *Warwick 1980, Lecture Notes in Mathematics* (eds. Rand, D. & Young, L.-S.) **898**, 366–381 (Springer-  
427 Verlag, 1981).
- 428 39. Ebisuzaki, W. A method to estimate the statistical significance of a correlation when the data are  
429 serially correlated. *J. Clim.* (1997). doi:10.1175/1520-0442(1997)010<2147:AMTETS>2.0.CO;2
- 430 40. Deyle, E. R. *et al.* Predicting climate effects on Pacific sardine. *Proc. Natl. Acad. Sci. U. S. A.* **110**,  
431 6430–6435 (2013).
- 432 41. Kendall, M. G. A new measure of rank correlation. *Biometrika* (1938). doi:10.2307/2332226
- 433 42. Ye, H. *et al.* rEDM: Applications of Empirical Dynamic Modeling from Time Series. R package version  
434 0.7.1. (2018). doi:10.1038/344734a0
- 435 43. Kartzinel, T. R. & Pringle, R. M. Molecular detection of invertebrate prey in vertebrate diets:  
436 Trophic ecology of Caribbean island lizards. *Mol. Ecol. Resour.* **15**, 903–914 (2015).
- 437 44. Ushio, M. *et al.* Environmental DNA enables detection of terrestrial mammals from forest pond  
438 water. *Molecular Ecology Resources* (2017). doi:10.1111/1755-0998.12690
- 439 45. Boyer, F. *et al.* obitools: A unix-inspired software package for DNA metabarcoding. *Mol. Ecol.*  
440 *Resour.* (2016). doi:10.1111/1755-0998.12428
- 441 46. Martin, M. Cutadapt removes adapter sequences from high-throughput sequencing reads.  
442 *EMBnet.journal* (2011). doi:10.14806/ej.17.1.200
- 443 47. Pianka, E. R. The Structure of Lizard Communities. *Annu. Rev. Ecol. Syst.* (1973).  
444 doi:10.1146/annurev.es.04.110173.000413
- 445 48. Meredith, M. & Ridout, M. Overview of the overlap package. *R Proj.* 1–9 (2017).

BioRxiv Preprint

446 49. Ridout, M. S. & Linkie, M. Estimating overlap of daily activity patterns from camera trap data. *J.*  
447 *Agric. Biol. Environ. Stat.* (2009). doi:10.1198/jabes.2009.08038

448
